# Supplementary material for: C subunit of the ATP synthase is an amyloidogenic calcium dependent channel-forming peptide with possible implications in mitochondrial permeability transition
Source: PubMed Central journal article supplement (PMC8062469; doi:10.1038/s41598-021-88157-z), 2021-04-22
Supplement: 41598_2021_88157_MOESM1_ESM.pdf [file 41598_2021_88157_MOESM1_ESM.pdf]

## **C subunit of the ATP synthase is an amyloidogenic calcium dependent channel-forming peptide with possible implications in mitochondrial permeability transition**

Giuseppe Federico Amodeo<sup>1</sup>, Brenda Yasia Lee<sup>2</sup>, Natalya Krilyuk<sup>1</sup>, Carina Teresa Filice<sup>2,3</sup>, Denis Valyuk<sup>1</sup>, Daniel Erik Otzen<sup>4</sup>, Sergey Noskov<sup>5</sup>, Zoya Leonenko<sup>2,3</sup>, Evgeny V. Pavlov<sup>1,\*</sup>

<sup>1</sup>Department of Molecular Pathobiology, New York University,  
<sup>2</sup>Department of Physics & Astronomy, University of Waterloo, Canada, <sup>3</sup>Department of Biology, University of Waterloo, Canada, <sup>4</sup>Interdisciplinary Nanoscience Center (iNANO) and Department of Molecular Biology and Genetics, Aarhus University, Aarhus C, Denmark, <sup>5</sup>Centre for Molecular Simulation and Biochemistry Research Cluster, Department of Biological Sciences, University of Calgary, Canada

**A**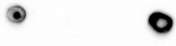

Exp. Time 40 sec

**B**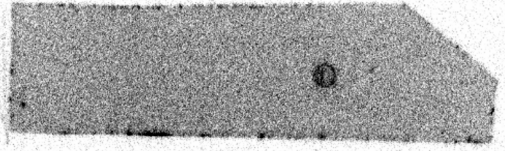

Exp. Time 10 sec

**C**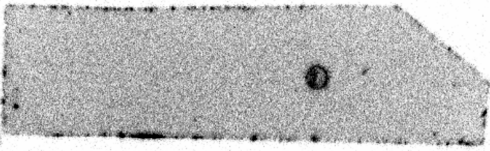

Exp. Time 20 sec

**D**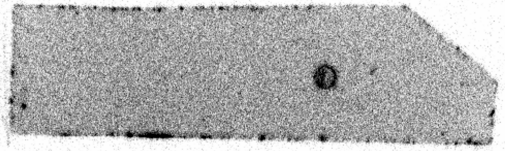

Exp. Time 30 sec

**E**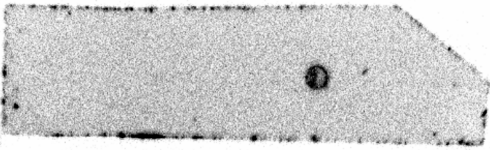

Exp. Time 50 sec

**F**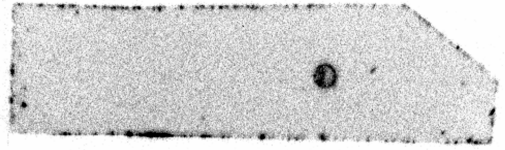

Exp. Time 60 sec

**Supplementary Figure 1:** Dot blots of the unmodified c subunit incubated in absence and in presence of  $\text{Ca}^{2+}$  using (A) anti c subunit antibodies and (B-F) A11-19 antibodies at different exposures (reported below every blot).
